# Supplementary material for: Rad1 and Rad10 Tied to Photolyase Regulators Protect Insecticidal Fungal Cells from Solar UV Damage by Photoreactivation
Source: MDPI journal article supplement (doi:10.3390/jof8111124), 2022-10-25
Supplement: s1 [file s1]

Supplementary Material for Journal of Fungi

## **Rad1 and Rad10 Tied to Photolyase Regulators Protect Insecticidal Fungal Cells from Solar UV Damage by Photoreactivation**

Lei Yu<sup>†</sup>, Si-Yuan Xu<sup>†</sup>, Xin-cheng Luo, Sheng-Hua Ying, Ming-Guang Feng<sup>\*</sup>

Institute of Microbiology, College of Life Sciences, Zhejiang University, Hangzhou, Zhejiang, 310058, China

<sup>†</sup> These authors contribute equally to this study.

<sup>\*</sup> For correspondence. E-mail: mgfeng@zju.edu.cn (M.G.F); Tel/Fax: (+)86 571 88206178

**Table S1.** Paired primers used for manipulation and detection of target genes in *B. bassiana*.

| Primers     | Paired sequences (5'–3')                                                                                                      | Purpose                                                                                |
|-------------|-------------------------------------------------------------------------------------------------------------------------------|----------------------------------------------------------------------------------------|
| cRad1-F/R   | <u>CAATCACAAACACCTTCAAAATGTCGACAAACAATGCGCC</u> / <u>TCCTCGCCCTTGCTCAC</u><br><u>CATGTAATCTTCTCGTCCATGA</u>                   | Cloning <i>rad1</i> cDNA (2820 bp) for fusion to <i>gfp</i>                            |
| cRad10-F/R  | <u>CAATCACAAACACCTTCAAAATGGCTGACGAATACGGCGC</u> / <u>TCCTCGCCCTTGCTCA</u><br><u>CCATTTTGCGAAGCTTTGCCAGCG</u>                  | Cloning <i>rad10</i> cDNA (1176 bp) for fusion to <i>gfp</i> or <i>mCherry</i>         |
| adRad1-F/R  | <u>GCCATGGAGGCCAGTGAATTCATGTCGACAAACAATGCGCC</u> / <u>CAGCTCGAGCTCGAT</u><br><u>GGATCCGTAATCTTCTCGTCCATGA</u>                 | Cloning <i>rad1</i> cDNA (2820 bp) for ligation to AD ( <i>EcoRV/BamHI</i> )           |
| bdRad1-F/R  | <u>ATGGCCATGGAGGCCGAATTCATGTCGACAAACAATGCGCC</u> / <u>CGTGCAGGTCGAC</u><br><u>GGATCCGTAATCTTCTCGTCCATGA</u>                   | Cloning <i>rad1</i> cDNA (2820 bp) for ligation to BD ( <i>EcoRV/BamHI</i> )           |
| adRad10-F/R | <u>GCCATGGAGGCCAGTGAATTCATGGCTGACGAATACGGCGC</u> / <u>CAGCTCGAGCTCGAT</u><br><u>GGATCCTTTGCGAAGCTTTGCCAGCG</u>                | Cloning <i>rad10</i> cDNA (1176 bp) for ligation to AD ( <i>EcoRV/BamHI</i> )          |
| bdRad10-F/R | <u>ATGGCCATGGAGGCCGAATTCATGGCTGACGAATACGGCGC</u> / <u>CGTGCAGGTCGAC</u><br><u>GGATCCTTTGCGAAGCTTTGCCAGCG</u>                  | Cloning <i>rad10</i> cDNA (1176 bp) for ligation to BD ( <i>EcoRV/BamHI</i> )          |
| adWC1-F/R   | <u>GCCATGGAGGCCAGTGAATTCATGGAAGGATACTACCTCC</u> / <u>CAGCTCGAGCTCGAT</u><br><u>GGATCCAGGTAAGCTCGTTTCACGCT</u>                 | Cloning <i>wc1</i> cDNA (2889 bp) for ligation to AD ( <i>EcoRV/BamHI</i> )            |
| adWC2-F/R   | <u>GCCATGGAGGCCAGTGAATTCATGTCCAGGACACGCGCC</u> / <u>CAGCTCGAGCTCGAT</u><br><u>GGATCCGCTTCCGGCACCAAACTCTG</u>                  | Cloning <i>wc2</i> cDNA (1497 bp) for ligation to AD ( <i>EcoRV/BamHI</i> )            |
| bdWC1-F/R   | <u>ATGGCCATGGAGGCCGAATTCATGGAAGGATACTACCTCC</u> / <u>CGTGCAGGTCGAC</u><br><u>GGATCCAGGTAAGCTCGTTTCACGCT</u>                   | Cloning <i>wc1</i> cDNA (2889 bp) for ligation to BD ( <i>EcoRV/BamHI</i> )            |
| bdWC2-F/R   | <u>ATGGCCATGGAGGCCGAATTCATGTCCAGGACACGCGCC</u> / <u>CGTGCAGGTCGAC</u><br><u>GGATCCGCTTCCGGCACCAAACTCTG</u>                    | Cloning <i>wc2</i> cDNA (1497 bp) for ligation to BD ( <i>EcoRV/BamHI</i> )            |
| adPhr1-F/R  | <u>GCCATGGAGGCCAGTGAATTCATGGCGCTCGTGAACGAA</u> / <u>CAGCTCGAGCTCGAT</u><br><u>GGATCC CGCCACAGCCGCTTGTACG</u>                  | Cloning <i>phr1</i> cDNA (1761 bp) for ligation to AD ( <i>EcoRV/BamHI</i> )           |
| bdPhr1-F/R  | <u>ATGGCCATGGAGGCCGAATTCATGGCGCTCGTGAACGAA</u> / <u>CGTGCAGGTCGAC</u><br><u>GGATCCCGCCACAGCCGCTTGTACG</u>                     | Cloning <i>phr1</i> cDNA (1761 bp) for ligation to BD ( <i>EcoRV/BamHI</i> )           |
| adPhr2-F/R  | <u>GCCATGGAGGCCAGTGAATTCATGACAAAGCCAGAGTCAT</u> / <u>CAGCTCGAGCTCGAT</u><br><u>GGATCCCGTTTTCTGCTTCTCGCTG</u>                  | Cloning <i>phr2</i> cDNA (1869 bp) for ligation to AD ( <i>EcoRV/BamHI</i> )           |
| bdPhr2-F/R  | <u>ATGGCCATGGAGGCCGAATTCATGACAAAGCCAGAGTCAT</u> / <u>CGTGCAGGTCGAC</u><br><u>GGATCCCGTTTTCTGCTTCTCGCTG</u>                    | Cloning <i>phr2</i> cDNA (1869 bp) for ligation to BD ( <i>EcoRV/BamHI</i> )           |
| Pphr1-F/R   | <u>AAGCTTGAATTCGAGCTCGGTATCCACGCCGTCGAATAAG</u> / <u>CTCGAGGTCGACAGATC</u><br><u>CCCGGGAAGGGTACGCGATGGTAATTA</u>              | Cloning <i>Pphr1</i> (1829 bp) ( <i>XmaI</i> )                                         |
| Pphr2-F/R   | <u>AAGCTTGAATTCGAGCTCGGTAACTAGGGGACAGACACTTGC</u> / <u>CTCGAGGTCGACA</u><br><u>GATCCCGGGGTTTCTGATTGAAACTGGA</u>               | Cloning <i>Pphr2</i> (1904 bp) ( <i>XmaI</i> )                                         |
| upRad1-F/R  | <u>ACGAGCTGTACAAGTAA</u> <b>CCCGGGG</b> CGTGGAGCCTGATT / <u>TGGTGCAGGTCGAC</u><br><u>GGATCCCGAATGCTTCAGCGTGTTT</u>            | Cloning <i>rad1</i> 5'-end (1593 bp) for disruption ( <i>XmaI/BamHI</i> )              |
| dnRad1-F/R  | <u>GACCCATGGCTCGAGTCTAGAGGTTGTAAACACCGACTTTCAGA</u> / <u>GGTGGTGGTGG</u><br><u>CTAGCGTTAAACGACGACAGAGGCAAGGTAG</u>            | Cloning <i>rad1</i> 3'-end (1673 bp) for disruption ( <i>XbaI/HpaI</i> )               |
| upRad10-F/R | <u>ACGAGCTGTACAAGTAA</u> <b>CCCGGGG</b> CGTGTGCGAGACGAGGTA / <u>CGGTACCAAGCTTG</u><br><u>GCTGCAGGAACGGATCGGAAGAAAG</u>        | Cloning <i>rad10</i> 5'-end (1633 bp) for disruption ( <i>XmaI/PstI</i> )              |
| dnRad10-F/R | <u>GACCCATGGCTCGAGTCTAGAGTTCCGCTCTAGTCTCAA</u> / <u>GGTGGTGGTGGCTAGC</u><br><u>GTTAACTGCCCTCTGTCTCGTTA</u>                    | Cloning <i>rad10</i> 3'-end (1853 bp) for gene disruption ( <i>XbaI/HpaI</i> )         |
| upWC1-F/R   | <u>AGCTGTACAAGTAA</u> <b>CCCGGGG</b> ACCATAGAAGACCGAAGGC / <u>TGGTGCAGGTCGAC</u><br><u>GGATCCAGCCCTGATCCTTCTCTCAA</u>         | Cloning <i>wc1</i> 5'-end (1007 bp) for t disruption ( <i>XmaI/BamHI</i> )             |
| dnWC1-F/R   | <u>GACCCATGGCTCGAGTCTAGAGCGACGACATCCGATAC</u> / <u>GGTGGTGGTGGCTAGC</u><br><u>GTTAACTCTGCCGACCCGAACA</u>                      | Cloning <i>wc1</i> 3'-end (1136 bp) for disruption ( <i>XbaI/HpaI</i> )                |
| upWC2-F/R   | <u>AGCTGTACAAGTAA</u> <b>CCCGGGG</b> GATGCTATTCCAGCGACTTTT / <u>TGGTGCAGGTCGAC</u><br><u>GGATCCGAGCGAGTCGTGTCTACCG</u>        | Cloning <i>wc2</i> 5'-end (1190 bp) for disruption ( <i>XmaI/BamHI</i> )               |
| dnWC2-F/R   | <u>GACCCATGGCTCGAGTCTAGAGCGTGGCGAAGAAGGA</u> / <u>GGTGGTGGTGGCTAGC</u><br><u>GTTAAACGACGCACTGTTTGGGAAG</u>                    | Cloning <i>wc2</i> 3'-end (723 bp) for disruption ( <i>XbaI/HpaI</i> )                 |
| flRad1-F/R  | <u>ATCCGTCGACCTGCAGCC</u> <b>AAGCTT</b> GGGGAGCAACCACAAAGT / <u>ACACTAGTCAGAT</u><br><u>CTTCTCTAGACCAGGATAGGAATCGCAA</u>      | Cloning full-length <i>rad1</i> (6680 bp) for complementation ( <i>HindIII/XbaI</i> )  |
| flRad10-F/R | <u>ATCCGTCGACCTGCAGCC</u> <b>AAGCTT</b> TTGCTTCTCGTCGTAACCC / <u>ACACTAGTCAGATCT</u><br><u>TCTCTAGAAATGCCCTCCTGTCTCGT</u>     | Cloning full-length <i>rad10</i> (4371 bp) for complementation ( <i>HindIII/XbaI</i> ) |
| flWC1-F/R   | <u>ATCCGTCGACCTGCAGCC</u> <b>AAGCTT</b> CTCAACGCCGTAGTCCATA / <u>ACACTAGTCAGATCT</u><br><u>TCTCTAGAGCGGTCGTGAGGTGATTGT</u>    | Cloning full-length <i>wc1</i> (6362 bp) for complementation ( <i>HindIII/XbaI</i> )   |
| flWC2-F/R   | <u>ATCCGTCGACCTGCAGCC</u> <b>AAGCTT</b> CTCAGTAAGAAGACCGAAGGCT / <u>ACACTAGTCAGAT</u><br><u>CTTCTCTAGAAGCGGTCGTGAGGTGATTG</u> | Cloning full-length <i>wc2</i> (4790 bp) for complementation ( <i>HindIII/XbaI</i> )   |
| pRad1-F/R   | TGAAACCATCTCAGCACAC / CACCAGCGGCATACATCTT                                                                                     | PCR detecting <i>rad1</i>                                                              |
| pRad10-F/R  | AATCGTCGTACGGAACCTT / GGATGAAGCGGTGGTATT                                                                                      | PCR detecting <i>rad10</i>                                                             |
| pWC1-F/R    | CGTACCCGAATACTAACAAT / ACAACGCCCTATGACGGA                                                                                     | PCR detecting <i>wc1</i>                                                               |
| pWC2-F/R    | CGCTTATTGTCATCATCTGTTC / TGGTACGCTTCTCTCTCTTC                                                                                 | PCR detecting <i>wc2</i>                                                               |

\* The underlined regions are DNA fragments to exchange for the corresponding fragments of constructed vectors at the sites(in bold) of indicated restriction enzymes.

**Table S2.** Paired primers used for the qPCR analyses of target genes in *B. bassiana*.

| Gene          | Tag locus <sup>a</sup> | Annotation <sup>b</sup> | Sequences (5'–3') of paired primers         |
|---------------|------------------------|-------------------------|---------------------------------------------|
| <i>rad1</i>   | BBA_07749              | Rad1 ortholog           | TCGTCACCAACCTACTGCAC / CGGCATACATCTTTTCGCGG |
| <i>rad10</i>  | BBA_03417              | Rad10 ortholog          | TCAGGATCAGGAGGCAAAGT / CAGCAAGCATGTCGTTGTTC |
| <i>wc1</i>    | BBA_10271              | White collar 1          | GACCATGCAATCAACAACG / GTATCGCTTGATCGACAGCA  |
| <i>wc2</i>    | BBA_01403              | White collar 2          | CCAGTCTCCTTTCTGCCAAG / TGGCAGATGAACCAGTCAAG |
| <i>phr1</i>   | BBA_01664              | CPD photolyase          | ACTCATAGACTGGCGCATGG / TTTTCGCTTGTCTCCAGCA  |
| <i>phr2</i>   | BBA_01034              | 6-4 PP photolyase       | CACAGGCAAGACGTACCCC / CGTCGTCACTCTCCAGAACA  |
| <i>rad2</i>   | BBA_00274              | Rad2 ortholog           | ATGGGCGTGAACGGTCTTT / ATCAAAGACGAAGACGGGCT  |
| <i>rad3A</i>  | BBA_10031              | Rad3 homolog 1          | AAGGCAAGGCTGGAATTTTT / CAAGCCTGATTGATCCACT  |
| <i>rad3B</i>  | BBA_00658              | Rad3 homolog 2          | ATGGTGAAGAGGGAATCACG / CAGGCCTTCTGGTAGAGACG |
| <i>rad4A</i>  | BBA_02814              | Rad4 homolog 1          | AGTCCGATATGCAAAGGCGT / TACTTCGTGGCGCCGTAAAT |
| <i>rad4B</i>  | BBA_02963              | Rad4 homolog 2          | CCTGATGGTACAGCCAAGGA/CGTGTCTCTTCCACTTCGT    |
| <i>rad14</i>  | BBA_03454              | Rad14 ortholog          | CTGCTTCCCATCTATCAA / TCCGTGAGCTTCTCCCTAAA   |
| <i>rad16A</i> | BBA_07794              | Rad16 homolog 1         | TTTCGAGTTTACAACGATGC / AGGAAACACTCCACGTCCAC |
| <i>rad16B</i> | BBA_01511              | Rad16 homolog 2         | CTCTAGTTCCGTCGCCAAAG / AACGCAGGTTGCTATCGAGT |
| <i>rad16C</i> | BBA_03842              | Rad16 homolog 3         | GGCTCCAATGTCCTTGTGT / TGAATCCGTAGCTCGTGATG  |
| <i>rad23</i>  | BBA_01030              | Rad23 ortholog          | AGCAGAAATCACCTCGAA / CAGACAACGAAGCCCTTTTC   |
| <i>rad25</i>  | BBA_01121              | Rad25 ortholog          | CACATGCCTTCGAGATTGCG / TTGCTCGTCATGTCGGAAA  |
| <i>rfa1</i>   | BBA_04757              | RFA1 ortholog           | ATGGTTGACGATACGGGGTA / GAGTCGTACCACCCCTTCAA |
| <i>rfa2</i>   | BBA_05125              | RFA2 ortholog           | CTTCGGTGGTCACGGTATCT / TCGTCAAATCATCCAGTCA  |
| <i>tfb1</i>   | BBA_08089              | TFIIH subunit TFB1      | AATCATGTCCCAGCAAGTCC / ACTCAGCTCTGGCGTCATTT |
| <i>tfb2</i>   | BBA_05749              | TFIIH subunit TFB2      | GTGATGCGCATGCTTTACAT / TGCACTTCTTGCGTCTTGTC |
| <i>tfb4</i>   | BBA_09804              | TFIIH subunit TFB4      | AAGGCCTACTCGCTACCTC / GAGAGGCAAATGGAGCAGAC  |
| <i>tfb5</i>   | BBA_04362              | TFIIH subunit TFB5      | ATGCCTCGTGCCATAAGAAG / GGCAAGTTTCTTGAGACG   |
| <i>ssl1</i>   | BBA_08550              | TFIIH subunit SSL1      | GCAGGGGAACCCTAGCTTAC / GGATTCGGTCGCTGATAAGA |
| <i>act</i>    | BBA_04860              | β-actin                 | GGCAACATTGTCATGTCTGG / TTTGCTGGAAGGTGGATAGG |

<sup>a</sup> Gene accession codes in *B. bassiana* genome under the NCBI accession NL\_ADAH00000000.

<sup>b</sup> All listed genes except *wc1*, *wc2*, *phr1* and *phr2* are annotated as components of putative NER pathway by referring to Boiteux and Jinks-Robertson (2013)

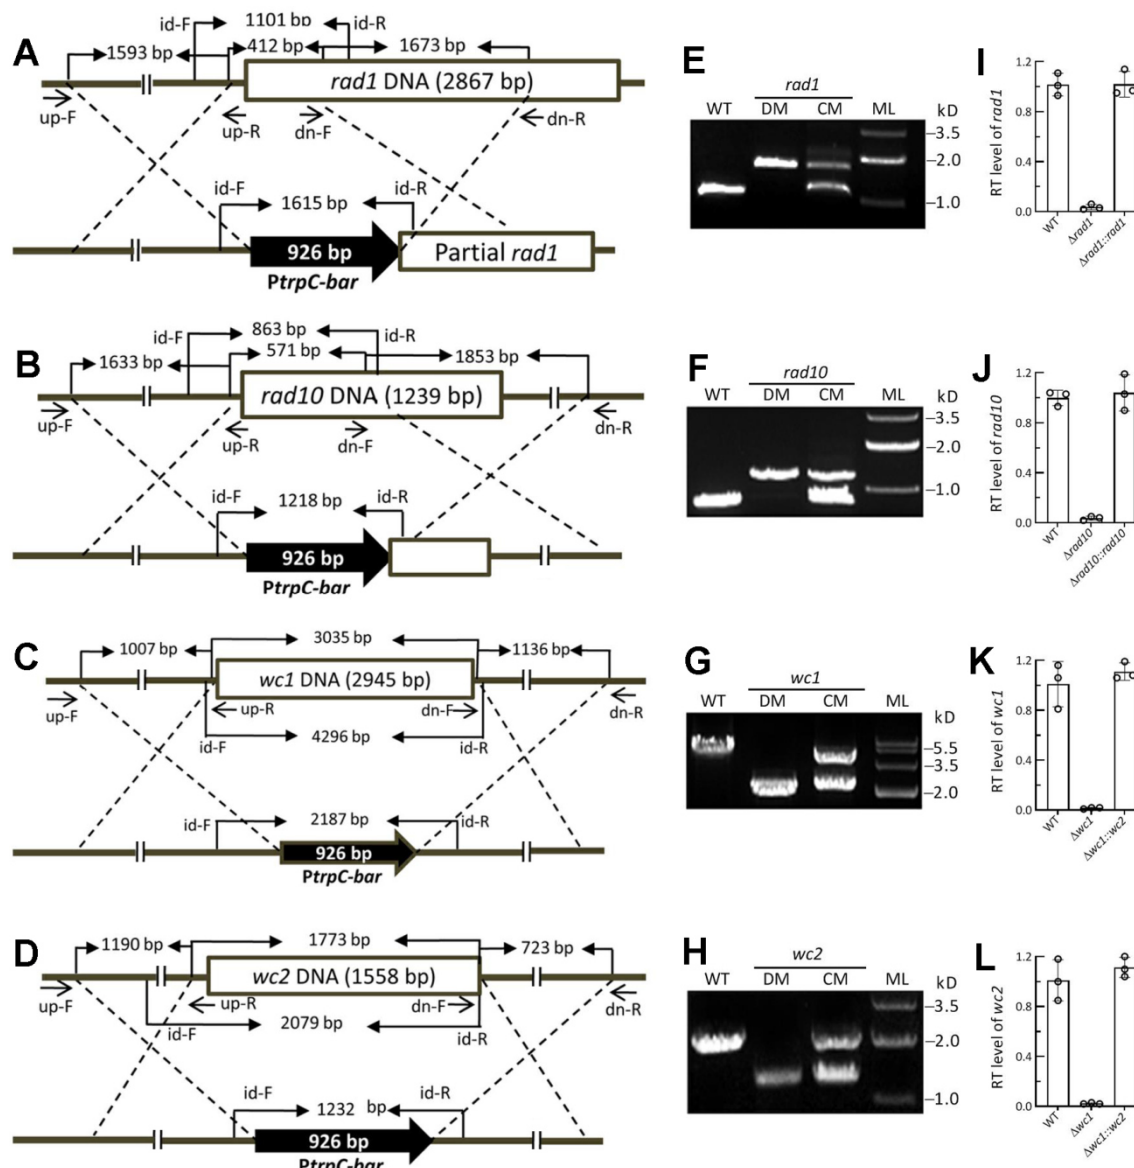

**Figure S1.** Generation and identification of *rad1*, *rad10*, *wc1* and *wc2* mutants in *B. bassiana*. (A–D) Schematic diagrams for targeted single-gene deletion strategies. (E–H) The *rad1*, *rad10*, *wc1* and *wc2* mutants identified via PCR analysis with paired primers (see Table S1), respectively. The detected DNA fragments indicate a success in deleting the partial or full-length coding and partial flanking regions of each target gene from the WT strain as expected and also in complementing it into the deletion mutant ( $1101 + 926 - 1615 = 412$  bp for *rad1*,  $863 + 926 - 1218 = 571$  bp for *rad10*,  $4296 + 926 - 2187 = 3035$  bp for *wc1*, and  $2079 + 926 - 1232 = 1773$  bp for *wc2*). DM, deletion mutant. CM, complementation mutant. ML, molecular ladder of genomic DNA. (I–L) Relative transcript (RT) levels of *rad1*, *rad10*, *wc1* and *wc2* in the 3 d-old SDAY cultures of their deletion and complementation mutants with respect to the WT standard. Note that the expression of each target gene was not detectable in its DM but well restored in its CM. Error bars: standard deviations of the means from three cDNA samples derived from independent cultures of each strain.

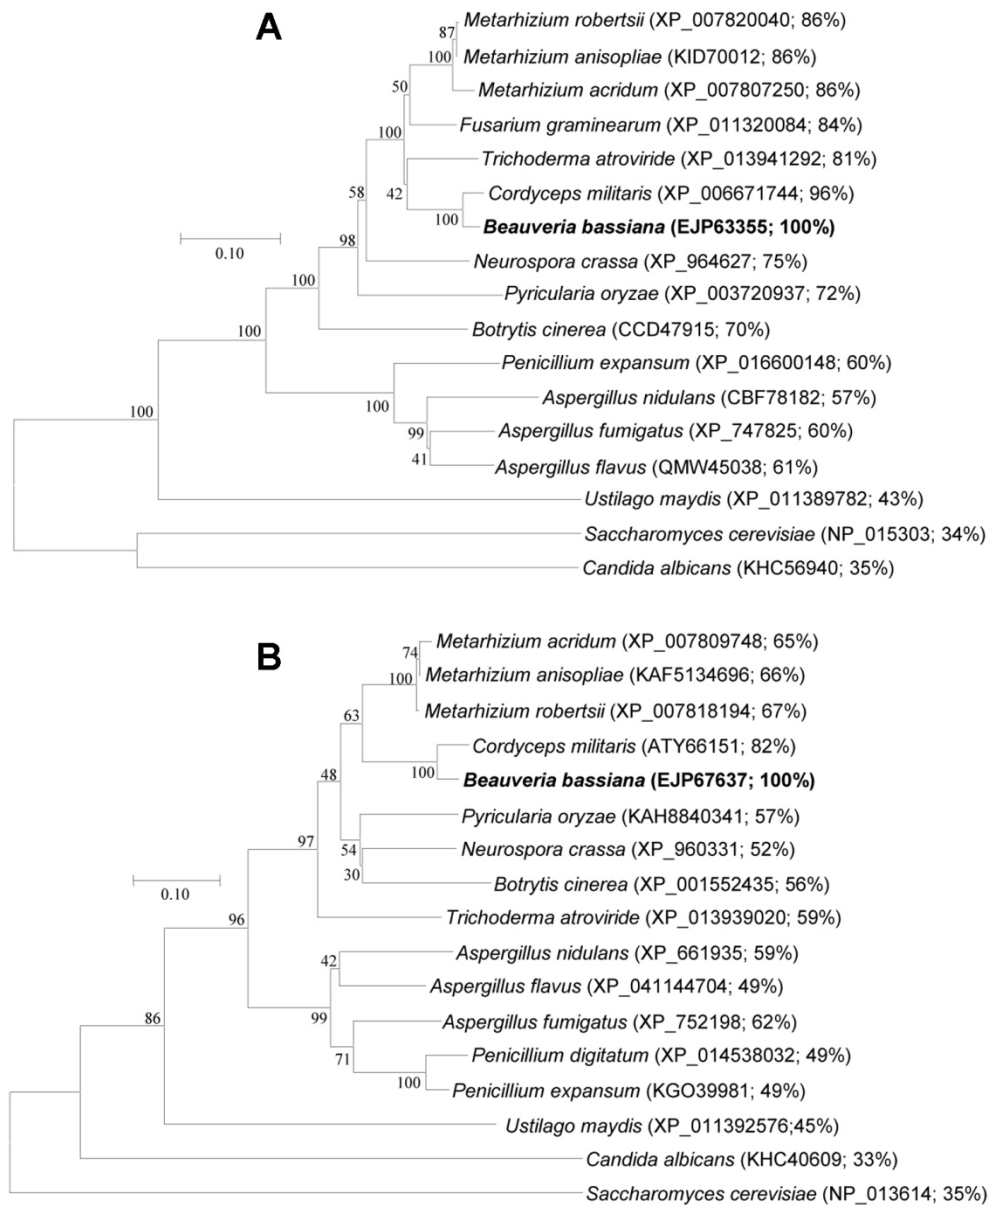

**Figure S2.** Phylogenetic relationships of Rad1 (A) and Rad10 (B) orthologues found in selected filamentous fungi. Each tree was constructed with the maximum likelihood method in the online program MEGA7 (<http://www.megasoftware.net/>) Bootstrap values of 1000 replications are shown at nodes. Scale bar: branch length proportional to genetic distance. The NCBI accession code of each protein and its protein sequence identity to its *B. bassiana* orthologue (in bold) are given in the parentheses following the name of its host fungus.

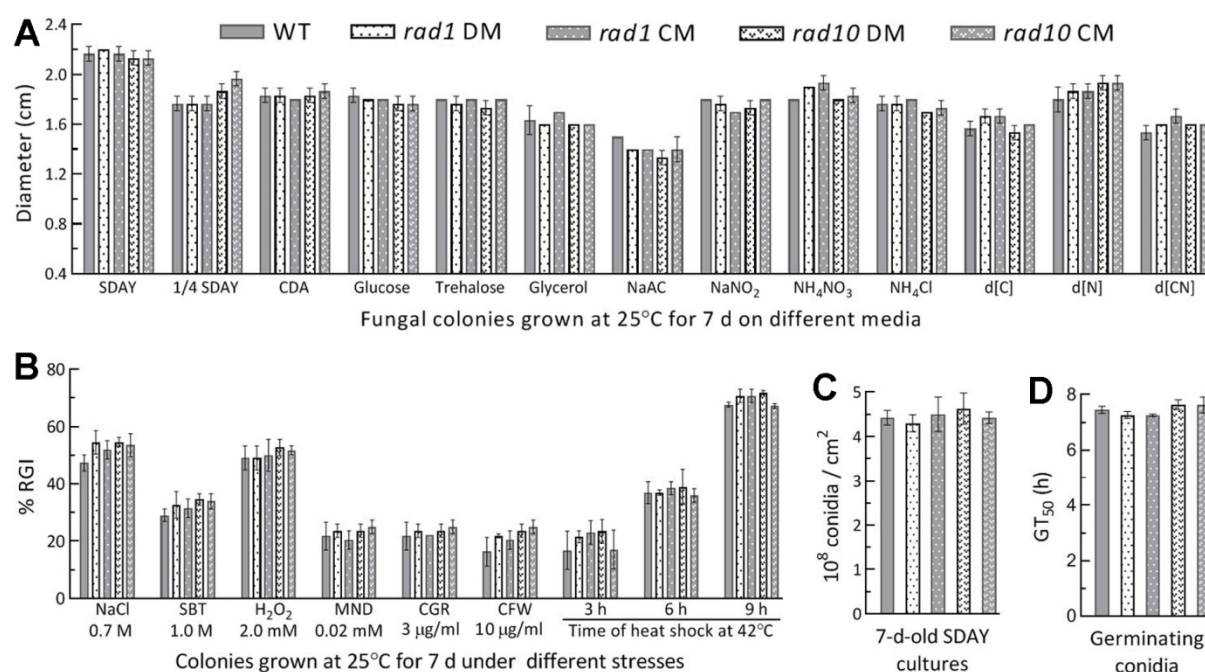

**Figure S3.** Dispensable roles of Rad1 and Rad10 in the asexual cycle *in vitro* of *B. bassiana*. **(A)** Diameters of fungal colonies (DM, deletion mutant; CM, complementation mutant) incubated at 25°C for 7 days on the plates of rich medium SDAY, 1/4 SDAY, minimal medium CDA and CDAs amended with different carbon or nitrogen sources and with the deletion of carbon (d[C]) or nitrogen (d[N]) source or both (d[CN]). **(B)** Relative growth inhibition (RGI) percentages of fungal colonies incubated at 25°C for 7 days on CDA plates supplemented with indicated concentrations of different chemical stressors (SBT, sorbitol; MND, menadione; CGR, Congo red; and CFW, calcofluor white) or for 5-day growth recovery after exposing 2-day-old SDAY colonies to a heat shock for 3, 6 and 9 h at 42°C. All fungal colonies were initiated by spotting 1 µL aliquots of a 10<sup>6</sup> conidia/mL suspension. **(C)** Conidial yields measured from the 7-day-old SDAY cultures initiated by spreading 100 µL aliquots of a 10<sup>7</sup> conidia/mL suspension at the optimal regime of 25°C and L:D 12:12. **(D)** Median germination time (GT<sub>50</sub>) of conidia at 25°C. Error bars: standard deviations of the means from three independent replicates.

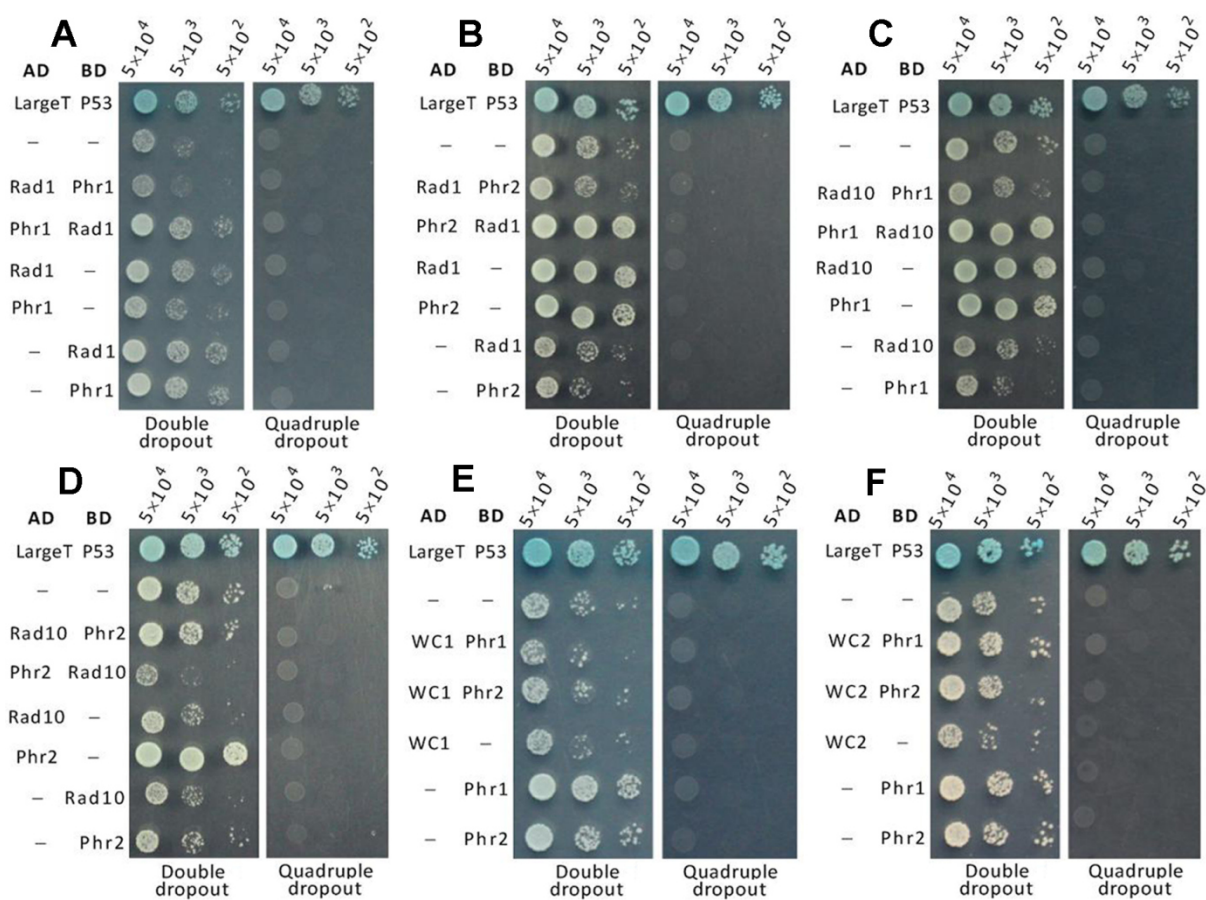

**Figure S4.** Y2H assays for protein-protein interactions in *B. bassiana*. Note no signals for interactions of either Rad1 or Rad10 with Phr1 and Phr2 (A-D) and of either WC1 (E) or WC2 (F) with Phr1 and Phr2.
